# Supplementary material for: Lymphoid origin of intrinsically activated plasmacytoid dendritic cells in mice
Source: eLife. 2024 Sep 13;13:RP96394. doi: 10.7554/eLife.96394 (PMC11398865; doi:10.7554/eLife.96394)
Supplement: Supplementary file 1. — CIPR IDs were generated using the top 1000 DEGs from each cluster. The top 5 consensus CIPR ID generated was used to rename Seurat clusters. [file elife-96394-supp1.xlsx]

## Sheet: Sheet1
Cluster	Ref. Cell Type	CIPR Ref. ID	Consensus ID	ID Score	Z Score
X0	DC	DC.pDC.8-.Sp	pDC3	0.87	2.92
X1	DC	DC.pDC.8-.Sp	pDC2	0.87	3.05
X2	DC	DC.pDC.8-.Sp	pDC4	0.86	2.69
X3	Macrophage	MF.Thio5.II+480	Mac1	0.79	2.46
X4	DC	DC.pDC.8-.Sp	pDC5	0.84	2.88
X5	Macrophage	MF.11cloSer.SI	Mac3	0.82	2.4
X6	Monocyte	Mo.6+2+.BL	Mono1	0.84	2.55
X7	Monocyte	Mo.6C-IIint.Bl	Mono2	0.85	3.02
X8	B cell	B.Fo.Sp	B Cells	0.82	1.93
X9	Stem-Progenitor	SC.CDP.BM	Prog2	0.83	2.16
X10	Granulocyte	GN.BM	Granul3	0.81	3.41
X11	DC	DC.pDC.8-.Sp	pDC1	0.84	3.1
X12	Granulocyte	GN.BM	Granul1	0.76	2.18
X13	DC	DC.pDC.8-.Sp	pDC8	0.75	2.19
X14	Granulocyte	GN.BM	Granul2	0.75	2.74
X15	DC	DC.pDC.8-.Sp	pDC6	0.81	1.91
X16	DC	DC.pDC.8-.Sp	B-pDC	0.75	2.25
X17	Macrophage	MF.II+480lo.PC	Mac2	0.75	2.11
X18	Stem-Progenitor	MLP.BM	Prog1	0.79	2.18
X19	NK cell	NK.DAP10-.Sp	NK Cells	0.72	1.41
X20	Monocyte	Mo.6C+II-.LN	Mono3	0.69	1.73
X21	DC	DC.pDC.8-.Sp	pDC7	0.62	2.97
