# Supplementary material for: Lymphoid origin of intrinsically activated plasmacytoid dendritic cells in mice
Source: eLife. 2024 Sep 13;13:RP96394. doi: 10.7554/eLife.96394 (PMC11398865; doi:10.7554/eLife.96394)
Supplement: Supplementary file 2. — The top 50 differentially expressed features of Prog1 in relation to Prog2 were calculated using Seurat using non-parametric Wilcoxon rank sum test. In blue are upregulated genes and in red are downregulated genes. [file elife-96394-supp2.xlsx]

## Sheet: Sheet1
Marker	p_val	avg_log2FC	pct.1	pct.2	p_val_adj
Jchain	0	8.37458	0.968	0.01	0
Iglc1	0	7.38408	0.753	0.024	0
Iglc2	0	6.93436	0.876	0.039	0
Ckap4	0	2.28861	0.817	0.05	0
Cd79a	0	2.13039	0.683	0.005	0
Iglv1	0	2.07227	0.366	0	0
Derl3	0	1.95156	0.608	0.007	0
Chst1	0	1.84324	0.478	0	0
Cd81	0	1.74884	0.731	0.045	0
Pou2af1	0	1.40827	0.511	0.001	0
Prg2	0	1.22151	0.484	0.002	0
Eaf2	0	1.20338	0.495	0.011	0
Fkbp11	0	0.971198	0.425	0.007	0
Cacna1s	0	0.816281	0.376	0.004	0
Tnfrsf17	0	0.810065	0.306	0.001	0
Lax1	0	0.653721	0.333	0.004	0
Rapgef3	0	0.63881	0.317	0.002	0
Oosp1	0	0.549178	0.306	0	0
Cacna1h	0	0.3548	0.274	0	0
Fam46c	1.94e-290	1.9734	0.758	0.059	3.13e-286
Prdm1	5.5e-274	0.655727	0.29	0.006	8.9e-270
St8sia6	1.28e-266	0.668541	0.269	0.005	2.07e-262
Igha	3.09e-214	8.55166	0.328	0.013	5e-210
Slamf7	5.6e-210	1.23326	0.527	0.038	9.07e-206
Egr1	5.09e-205	1.65324	0.505	0.035	8.24e-201
Igkc	1.18e-157	9.32948	0.935	0.258	1.91e-153
Ikzf3	9.76e-139	0.655167	0.339	0.022	1.58e-134
Atxn1	5.14e-137	0.502322	0.274	0.014	8.32e-133
Edem1	6.09e-130	2.24796	0.833	0.192	9.86e-126
Dennd5b	3e-121	1.20265	0.5	0.06	4.8e-117
Serpina3g	8.8e-111	0.446503	0.258	0.016	1.4e-106
Kcnn4	1.3e-110	0.746446	0.473	0.056	2.1e-106
Ptpn22	1.7e-109	0.487952	0.263	0.017	2.7e-105
Bst2	1.9e-107	-2.55211	0.812	0.981	3e-103
Tmem176b	4.5e-104	1.21053	0.581	0.094	7.2e-100
Tram2	1.8e-100	0.898306	0.435	0.052	2.87e-96
Tyrobp	2.8e-100	-2.93301	0.543	0.966	4.46e-96
Rgcc	8.2e-100	0.698419	0.392	0.043	1.32e-95
Plac8	1.1e-99	-2.74335	0.532	0.968	1.79e-95
Fau	1.1e-99	-1.51384	0.978	0.99	1.8e-95
Tmem176a	2.11e-94	1.14737	0.505	0.078	3.42e-90
Siglech	2.15e-94	-2.43541	0.435	0.975	3.48e-90
Rpl19	5.61e-93	-1.60971	0.898	0.974	9.08e-89
Rpl31	6.64e-93	-2.11381	0.726	0.969	1.07e-88
Rpl30	3.32e-92	-1.46995	0.919	0.984	5.38e-88
Man1a	5.39e-92	0.950944	0.516	0.078	8.73e-88
Mzb1	1.5e-91	2.69824	0.844	0.311	2.42e-87
Rps11	1.83e-90	-1.62328	0.93	0.983	2.95e-86
Rpl18a	2.41e-90	-1.47776	0.898	0.981	3.89e-86
